# Supplementary material
Source: MDPI journal article supplement (https://www.mdpi.com/2075-163X/12/12/1513)
Supplement: s1 [file s1]

Supplementary Materials

# Source apportionment and probabilistic ecological risk of heavy metal(loid)s in Mianyang-section sediments of Fujiang River, China

Huaming Du<sup>1,2</sup>, Xinwei Lu<sup>2,\*</sup>

<sup>1</sup> School of Resource and Environment Engineering, Mianyang Normal University, Mianyang 621000, China

<sup>2</sup> Department of Environmental Science, School of Geography and Tourism, Shaanxi Normal University, Xi'an 710119, China

\* Correspondence: luxinwei@snnu.edu.cn

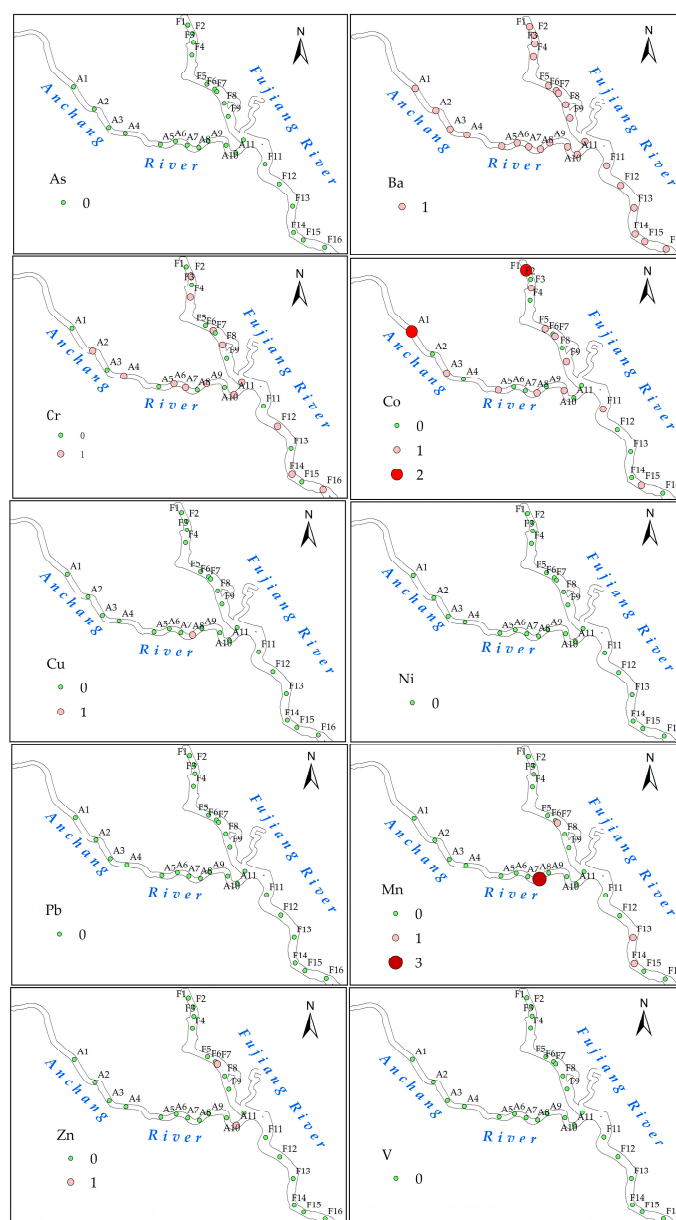

**Figure S1.** The  $I_{geo}$  level of HMs in Mianyang section of Fujiang River.

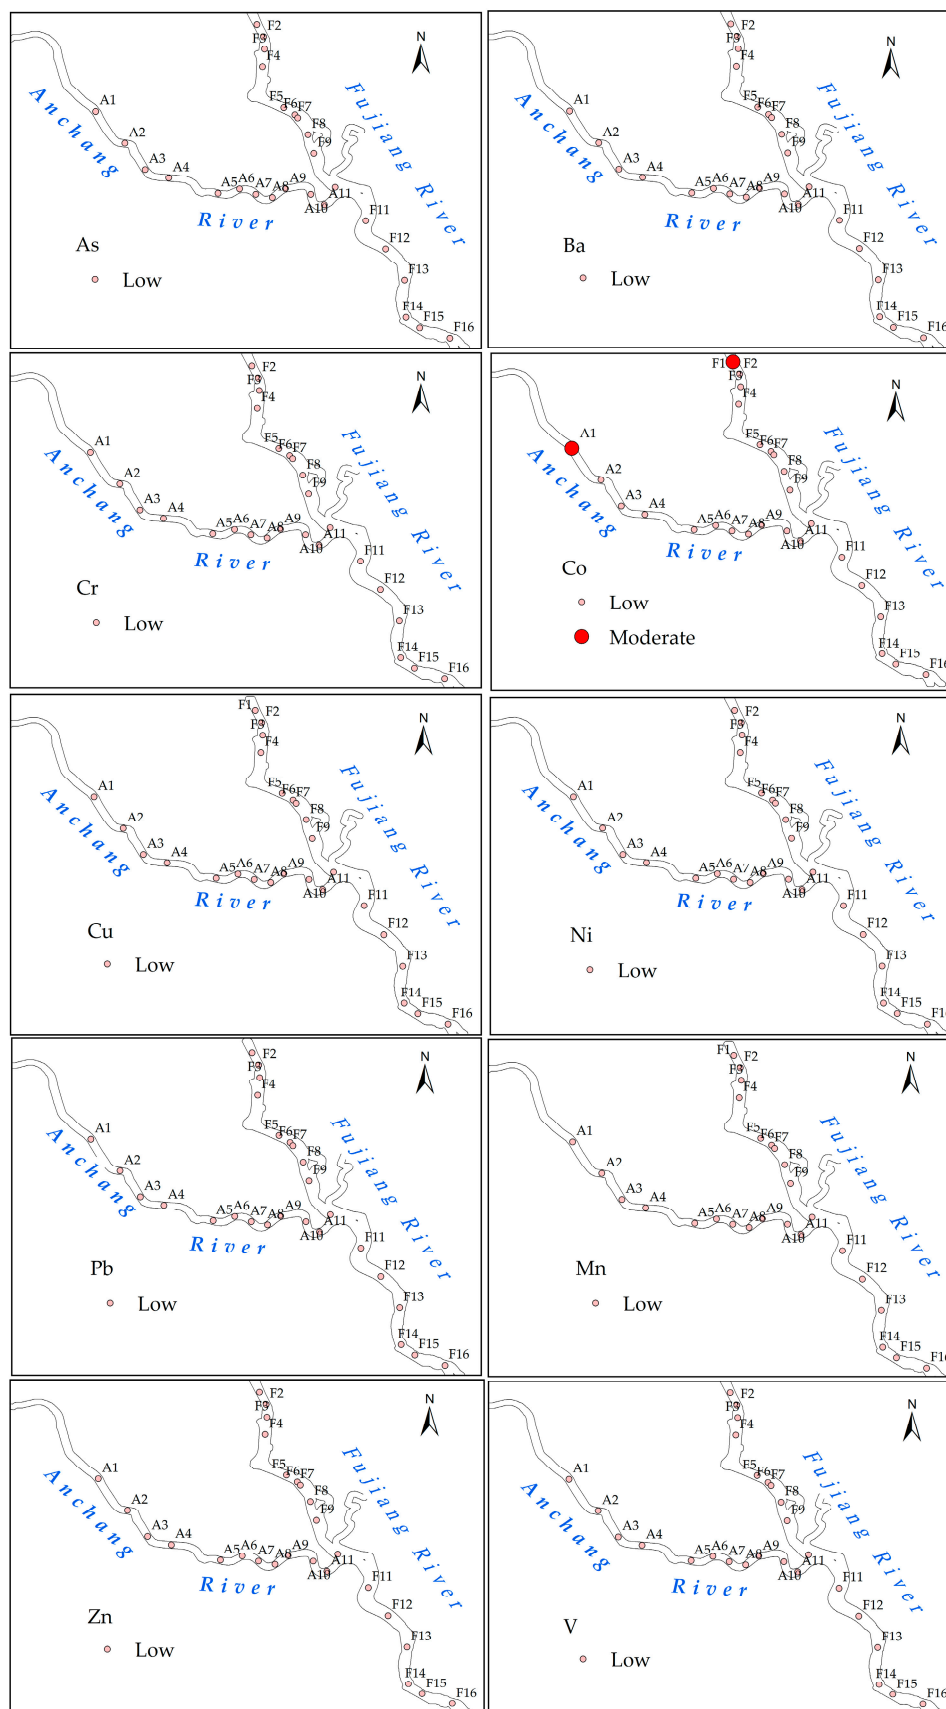

Figure S2. The  $E_i$  degree of HMs in Mianyang section of Fujiang River.

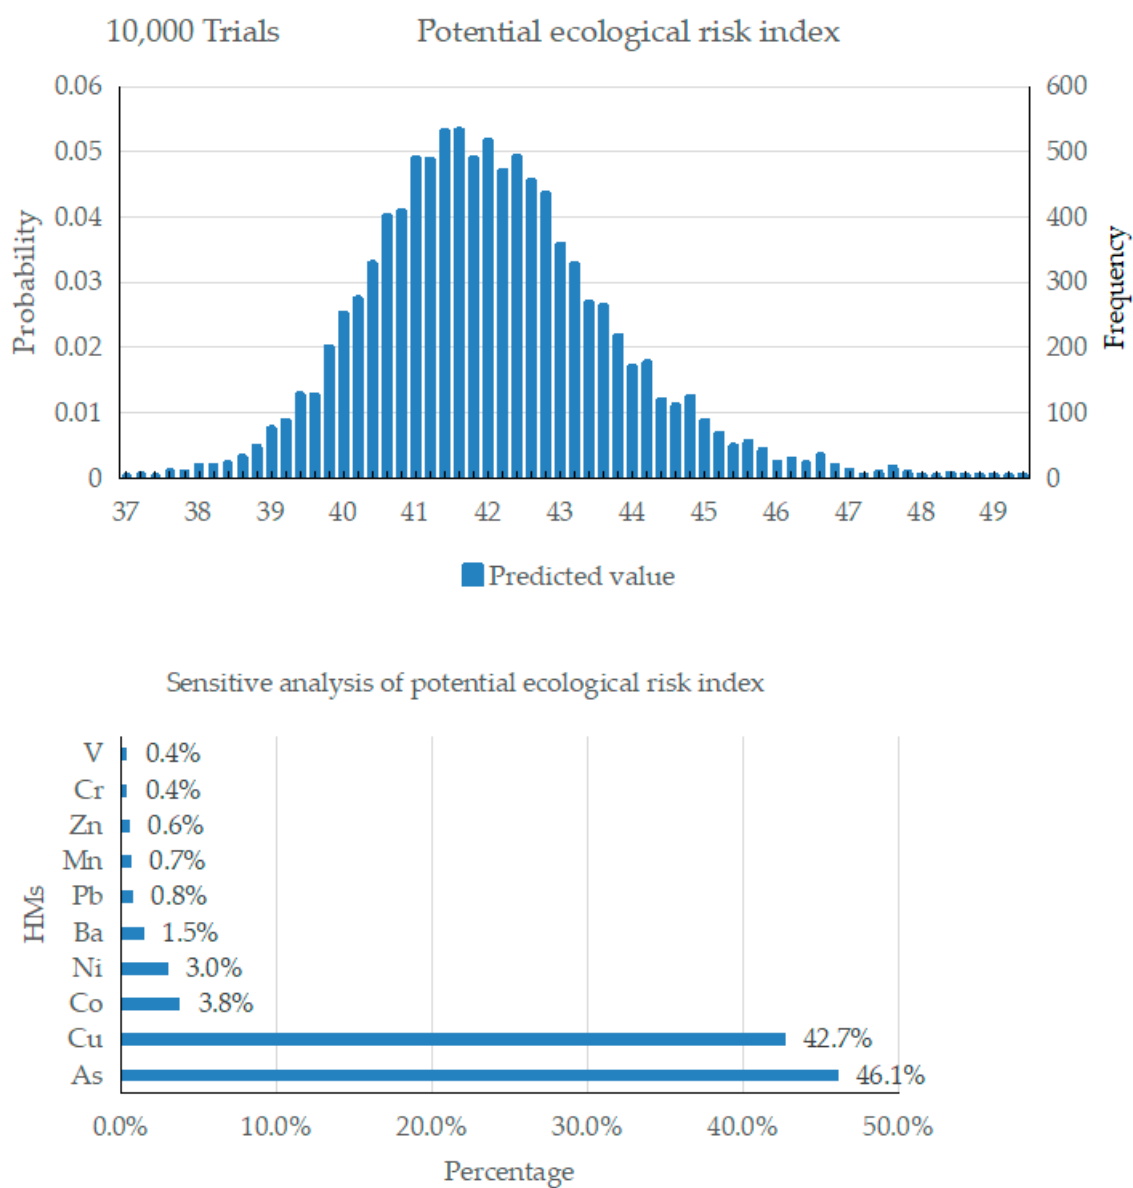

**Figure S3.** Probability distribution and sensitivity analysis of potential ecological risk index.

**Table S1.** Pollution level of geo-accumulation index ( $I_{geo}$ ) value and improved Nemerow index (INI).

| $I_{geo}$            | INI                | Grade | Pollution degree                          |
|----------------------|--------------------|-------|-------------------------------------------|
| $\leq 0$             | $INI < 0.5$        | 0     | Uncontaminated                            |
| $0 < I_{geo} \leq 1$ | $0.5 \leq INI < 1$ | 1     | Uncontaminated to moderately contaminated |
| $1 < I_{geo} \leq 2$ | $1 \leq INI < 2$   | 2     | Moderately contaminated                   |
| $2 < I_{geo} \leq 3$ | $2 \leq INI < 3$   | 3     | Moderately to heavily contaminated        |
| $3 < I_{geo} \leq 4$ | $3 \leq INI < 4$   | 4     | Heavily contaminated                      |
| $4 < I_{geo} \leq 5$ | $4 \leq INI < 5$   | 5     | Heavily to extremely contaminated         |
| $I_{geo} > 5$        | $INI \geq 5$       | 6     | Extremely contaminated                    |

**Table S2.** Grade of potential ecological risk index.

| $E_i$               | RI                  | Ecological risk degree |
|---------------------|---------------------|------------------------|
| $E_i < 15$          | $E_i < 50$          | Low                    |
| $15 \leq E_i < 30$  | $50 \leq RI < 100$  | Moderate               |
| $30 \leq E_i < 60$  | $100 \leq RI < 200$ | Considerable           |
| $60 \leq E_i < 120$ | $\geq 200$          | High                   |
| $E_i \geq 120$      |                     | Very high              |

**Table S3.** Distribution test and fitting results of HM contents.

| HMs | Mean   | Median | Standard deviation | Minimum | Maximum | Distribution   |
|-----|--------|--------|--------------------|---------|---------|----------------|
| As  | 8.72   | 7.90   | 2.72               | 4.90    | 14.50   | Gamma          |
| Ba  | 917.71 | 878.0  | 134.67             | 725.80  | 1340.60 | Lognormal      |
| Cr  | 121.11 | 118.6  | 51.67              | 59.5    | 229.6   | Beta           |
| Co  | 26.86  | 18.8   | 14.65              | 10.6    | 54.4    | Beta           |
| Cu  | 35.57  | 34.3   | 6.14               | 24.4    | 55.7    | Logistic       |
| Ni  | 37.27  | 36.8   | 6.46               | 27.1    | 48.7    | Beta           |
| Pb  | 22.27  | 22.1   | 5.00               | 16.2    | 36.4    | Beta           |
| Mn  | 886.41 | 686.5  | 777.47             | 455.9   | 4627.6  | Lognormal      |
| Zn  | 104.89 | 101.5  | 27.77              | 71.9    | 205.3   | Max<br>Extreme |
| V   | 103.24 | 100.3  | 15.72              | 80.2    | 141.9   | Beta           |
